# Supplementary material
Source: HighWire-hosted journal article supplement (https://erj.ersjournals.com/content/56/5/2000523)

## Implications of Obstructive sleep apnea on cognitive evolution of Alzheimer's disease patients

Carmen Jorge<sup>1\*</sup>, Adriano Targa<sup>2,3\*</sup>, Iván David Benítez<sup>2,3</sup>, Faride Dakterzada<sup>1</sup>, Gerard Torres<sup>2,3</sup>, Olga Minguez<sup>2</sup>; Anna Carnes<sup>1</sup>, Montse Pujol<sup>2</sup>, Aurora Gibert<sup>1</sup>, Ricard López<sup>1</sup>, Anna Michela Gaeta<sup>2</sup>, Ramón Farré<sup>3,4</sup>, Manuel Sánchez-de-la-Torres<sup>2,3</sup>, Ferran Barbé<sup>2,3</sup>, Gerard Piñol-Ripoll<sup>1\*\*</sup>

<sup>1</sup> Unitat Trastorns Cognitius, Clinical Neuroscience Research, IRBLleida-Hospital Universitari Santa Maria Lleida (Spain).

<sup>2</sup>Group of Translational Research in Respiratory Medicine, Hospital Universitari Arnau de Vilanova and Santa Maria, IRBLleida, Lleida, Spain.

<sup>3</sup> Centro de Investigación Biomédica en Red de Enfermedades Respiratorias (CIBERES), Madrid, Spain.

<sup>4</sup> Unitat Biofísica I Bioenginyeria, Facultat de Medicina, Universitat de Barcelona, Barcelona, Spain.

Figure E1. ADAS-cog evolution after 12 months of follow-up according to OSA severity (non-OSA, moderate and severe). ADAS-cog= Alzheimer’s Disease Assessment Scale-cognitive.

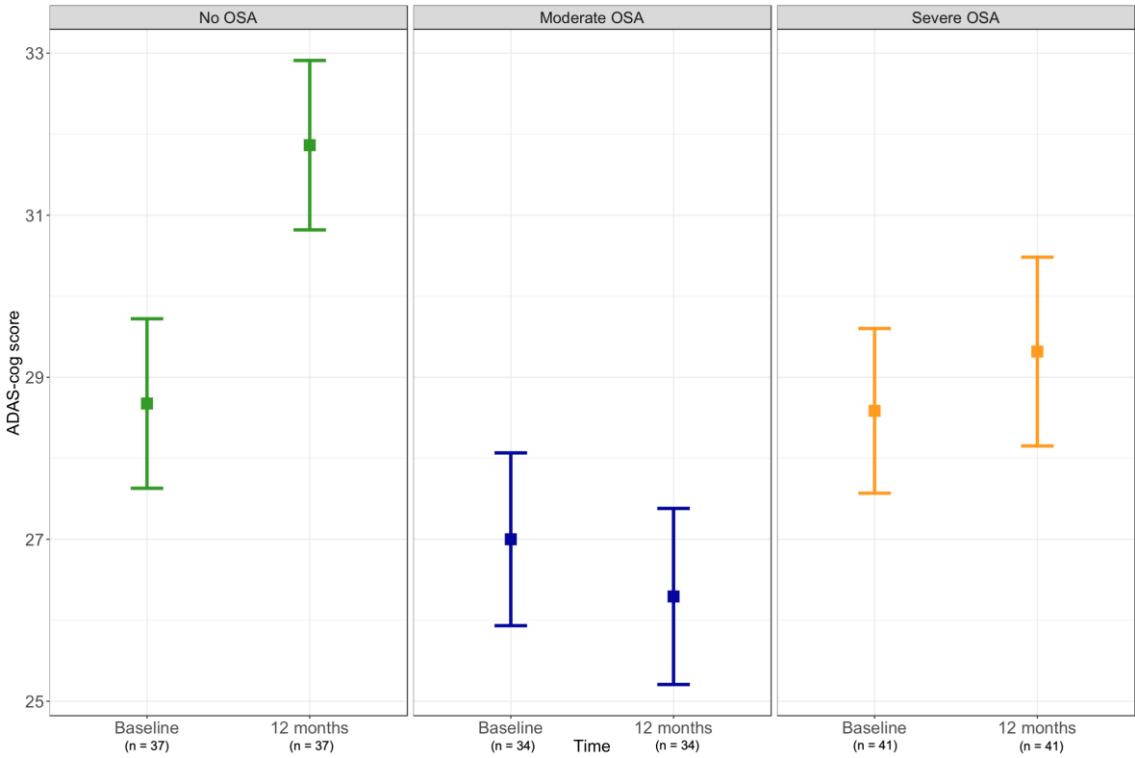

Figure E2. MMSE evolution after 36 months of follow-up according to OSA severity (non-OSA, moderate and severe). MMSE= Mini-Mental State Examination.

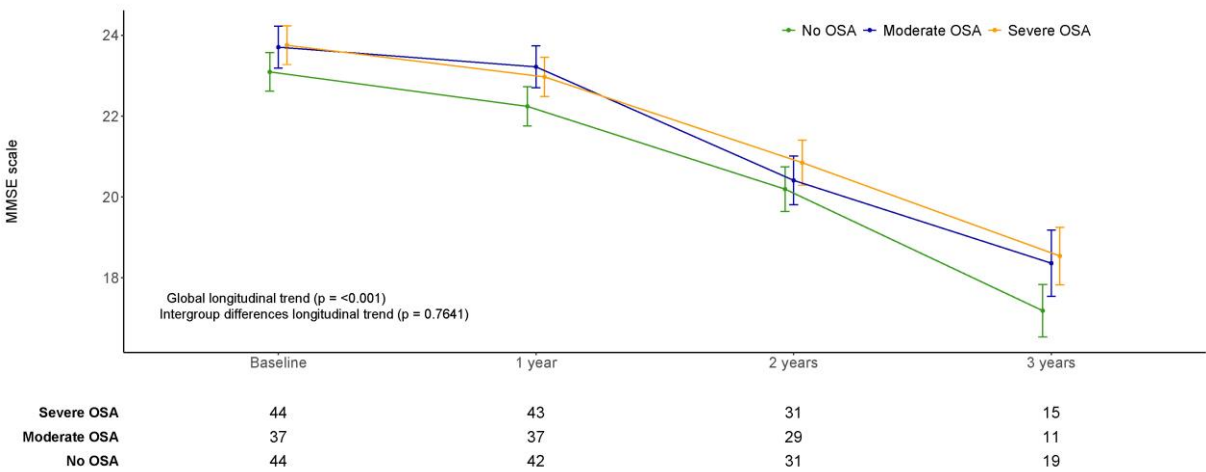

Figure E3. ADAS-cog evolution after 12 months of follow up in patients with  $A\beta_{42}$  in CSF  $\leq 600$  pg/ml according the presence of OSA. ADAS= Alzheimer's Disease Assessment Scale-cognitive.

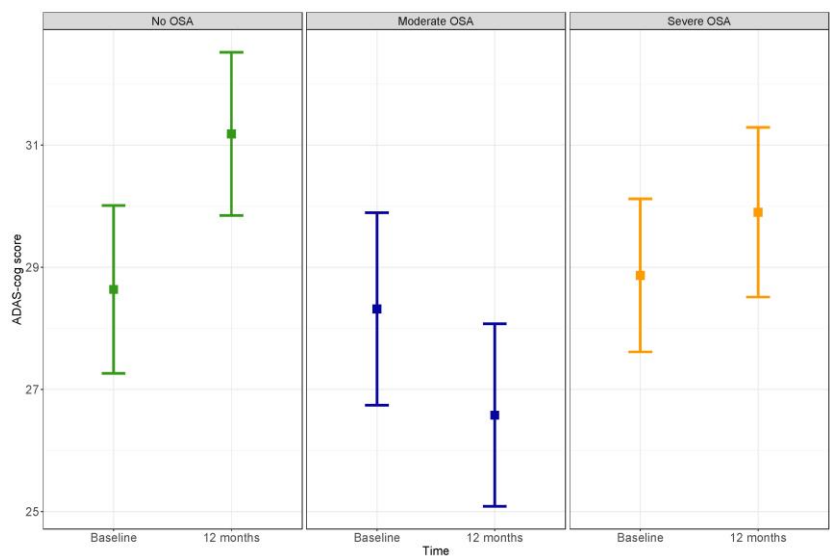

Figure E4. MMSE evolution after 12 months of follow up in patients with  $A\beta_{42}$  in CSF  $\leq 600$  pg/ml according the presence of OSA. MMSE= Mini-Mental State Examination.

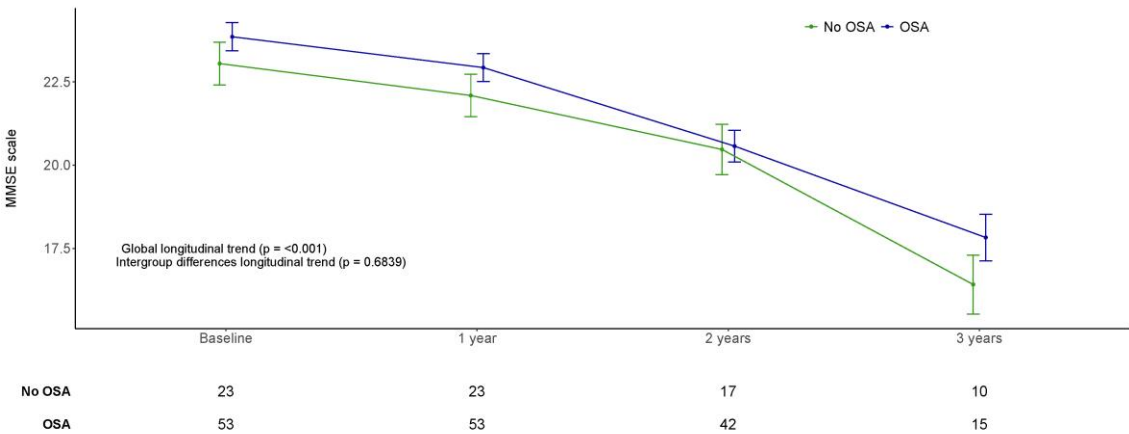

Figure E5. MMSE evolution according the status of T90% after 36 months of follow up. MMSE= Mini-Mental State Examination.

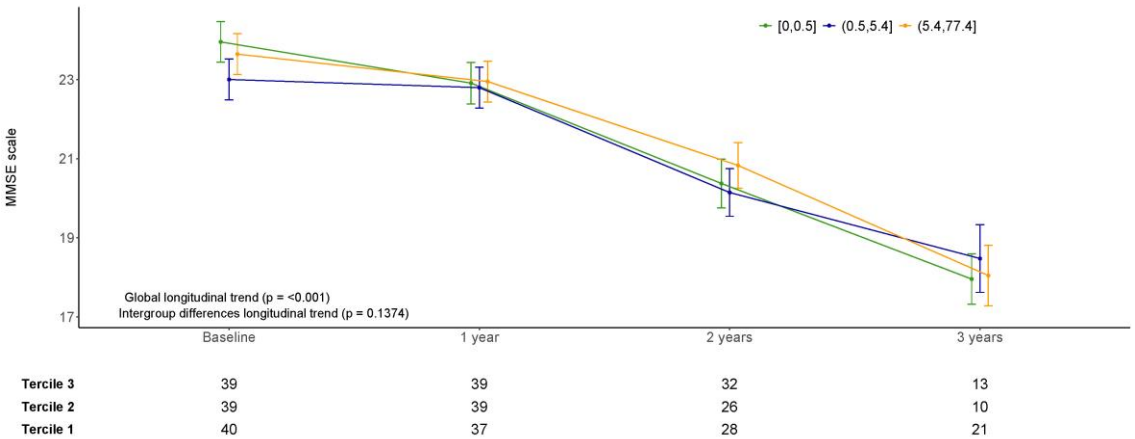

Figure E6. MMSE evolution according the status of arousal index after 36 months of follow up. MMSE= Mini-Mental State Examination.

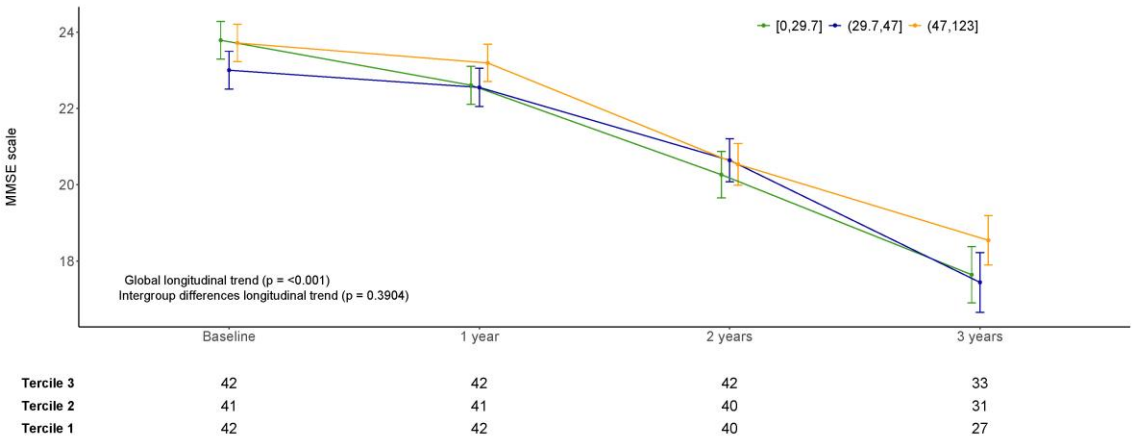

Supplement: inline-supplementary-material-1 [file inline-supplementary-material-1.pdf]
