# Supplementary material
Source: HighWire-hosted journal article supplement (https://erj.ersjournals.com/content/56/5/2000523)
Supplement: inline-supplementary-material-2 [file inline-supplementary-material-2.pdf]

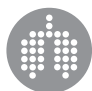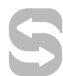

SHAREABLE PDF

# Obstructive sleep apnoea and cognitive decline in mild-to-moderate Alzheimer's disease

Carmen Jorge<sup>1,5</sup>, Adriano Targa<sup>2,3,5</sup>, Iván David Benítez<sup>1,2,3</sup>, Faride Dakterzada<sup>1</sup>, Gerard Torres<sup>2,3</sup>, Olga Minguez<sup>2</sup>, Anna Carnes<sup>1</sup>, Montse Pujol<sup>2</sup>, Aurora Gibert<sup>1</sup>, Ricard López<sup>1</sup>, Anna Michela Gaeta<sup>1,2</sup>, Mireia Dalmases<sup>1,2</sup>, Ramón Farré<sup>3,4</sup>, Manuel Sánchez-de-la-Torre<sup>2,3</sup>, Ferran Barbé<sup>2,3</sup> and Gerard Piñol-Ripoll<sup>1</sup>

**Affiliations:** <sup>1</sup>Unitat Trastorns Cognitius, Clinical Neuroscience Research, IRBLleida-Hospital Universitari Santa Maria, Lleida, Spain. <sup>2</sup>Group of Translational Research in Respiratory Medicine, Hospital Universitari Arnau de Vilanova and Santa Maria, IRBLleida, Lleida, Spain. <sup>3</sup>Centro de Investigación Biomédica en Red de Enfermedades Respiratorias (CIBERES), Madrid, Spain. <sup>4</sup>Unitat Biofísica i Bioenginyeria, Facultat de Medicina, Universitat de Barcelona, Barcelona, Spain. <sup>5</sup>These two authors contributed equally to the manuscript.

**Correspondence:** Gerard Piñol-Ripoll, Cognitive Disorders Unit, Hospital Universitari Santa Maria, Rovira Roure 44, 25198 Lleida, Spain. E-mail: gerard\_437302@hotmail.com

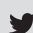

@ERSpublications

**Untreated OSA did not decrease the cognitive evolution of a population with mild and moderate Alzheimer's disease** <https://bit.ly/3e55zYH>

**Cite this article as:** Jorge C, Targa A, Benítez ID, *et al.* Obstructive sleep apnoea and cognitive decline in mild-to-moderate Alzheimer's disease. *Eur Respir J* 2020; 56: 2000523 [<https://doi.org/10.1183/13993003.00523-2020>].

This single-page version can be shared freely online.

**ABSTRACT** We evaluated the influence of untreated obstructive sleep apnoea (OSA) on the magnitude of cognitive decline and on several cognitive subdomains in patients with mild-to-moderate Alzheimer's disease.

In this single-centre study, 144 patients were recruited prospectively from a cognitive impairment unit and underwent overnight polysomnography.

The mean±SD change in the Alzheimer's Disease Assessment Scale cognitive subscale (ADAS-cog) score at 12 months was 3.19±5.61 in the non-OSA group and 0.08±5.62 in the OSA group, with an intergroup difference of −3.36 (95% CI 0.19–0.16; p=0.002). We did not observe a significant difference in any cognitive subdomains at 12 months. Regarding Mini-Mental State Examination scores at 36 months, the mean change was 1.69 (95% CI −1.26–4.64; p=0.445). No significant differences were found among different OSA severity groups.

We observed that ADAS-cog scores were better in the OSA group than in the non-OSA group by a statistically but not clinically significant margin. We did not find differences in the different cognitive subdomains after 1 year or in global cognition after 3 years of follow-up.
